# Supplementary material for: Heterogeneous reactions of NO 2 with CaCO 3 –(NH 4 ) 2 SO 4 mixtures at different relative humidities
Source: Copernicus journal article supplement (doi:10.5194/acp-16-8081-2016), 2016-07-04
Supplement: Supplementary file 1 [file acp-16-8081-2016-supplement.pdf]

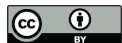

*Supplement of*

## **Heterogeneous reactions of NO<sub>2</sub> with CaCO<sub>3</sub>–(NH<sub>4</sub>)<sub>2</sub>SO<sub>4</sub> mixtures at different relative humidities**

**Fang Tan et al.**

*Correspondence to:* Maofa Ge ([gemaofa@iccas.ac.cn](mailto:gemaofa@iccas.ac.cn)) and Shengrui Tong ([tongsr@iccas.ac.cn](mailto:tongsr@iccas.ac.cn))

The copyright of individual parts of the supplement might differ from the CC-BY 3.0 licence.

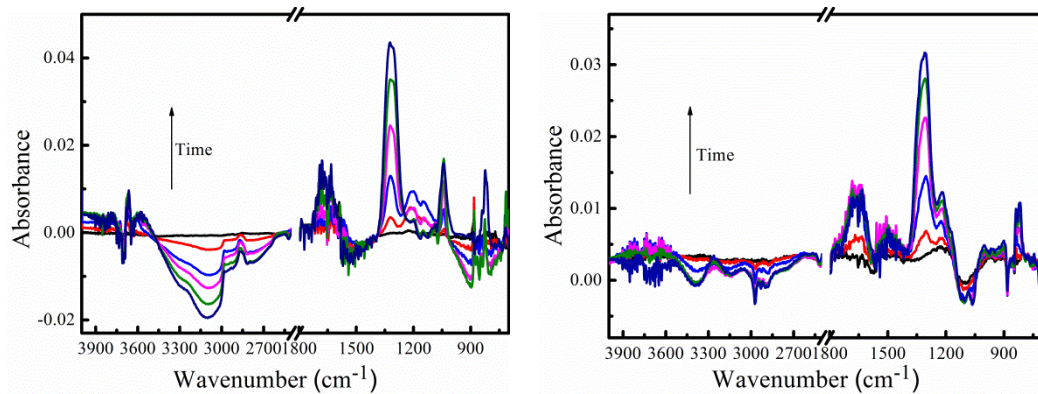

**Figure S1.** Absorption spectra recorded during the reaction of  $\text{NO}_2$  on (a) pure  $\text{CaCO}_3$  particle surfaces and (b) the mixture of FAS-57 under dry condition, and reaction times of 0 to 120 min. The concentration of  $\text{NO}_2$  was  $2.6 \times 10^{15}$  molecule  $\text{cm}^{-3}$ .

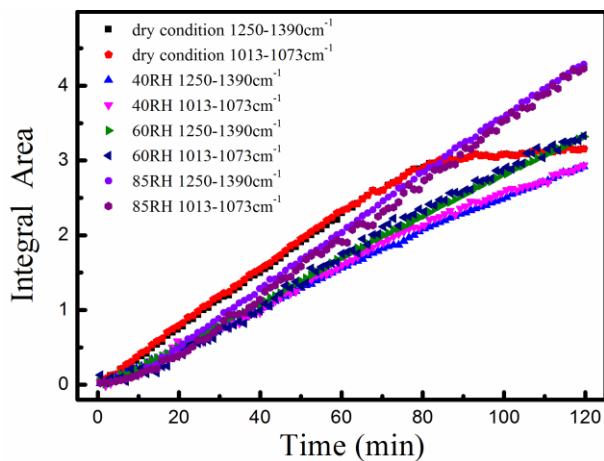

**Figure S2:** The integrated nitrate absorbance over the  $\nu_1$  region (1013-1073  $\text{cm}^{-1}$ ) and the  $\nu_3$  region (1250-1390  $\text{cm}^{-1}$ ) after the  $\nu_1$  region multiplied by 3, 7, 10, 12 under dry condition, 40% RH, 60% RH, and 85% RH, respectively, for the reaction of  $\text{NO}_2$  with  $\text{CaCO}_3$  particles.

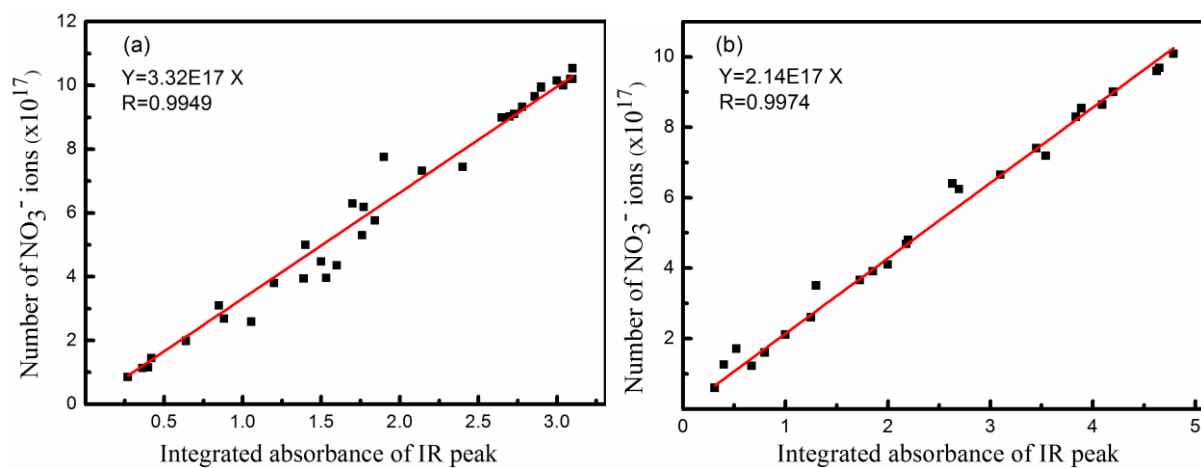

**Figure S3.** The number of  $\text{NO}_3^-$  ions detected by IC as a function of integrated absorbance of IR peak between  $1390$  and  $1250 \text{ cm}^{-1}$  at (a) dry condition, 40% RH, and 60% RH, (b) 85% RH.
